# Supplementary material
Source: publisher figshare collection journal article supplement (https://gsajournals.figshare.com/ndownloader/files/12955043)
Supplement: Supplementary file 1 [file 12955043]

Table S6: Details of the validation (see Figure 2C and 3D).
Comparison	Gene	Modification	df	Estimate	Z value	p-value
control vs mutant
BL264 vs BL11412	Dscam1	Null	1	-2.14	-5.3	<1e-4
BL264 vs BL31433	trpl	Null	1	-0.37	-1.1	0.51
BDSC36303 vs BL38945	Dscam1	Down-reg.	1	3.1	7.4	<0.001
BDSC36303 vs BL31593	fru	Down-reg.	1	0.47	1.3	0.52
BDSC36303 vs BL29547	Olf413	Down-reg.	1	-0.41	-0.97	0.75
BDSC36303 vs BL26722	trpl	Down-reg.	1	0.64	1.8	0.23
BDSC36303 vs BL32337	CG7627	Down-reg.	1	2.9	8.7	<1e-10
BDSC36303 vs BL35790	tou	Down-reg.	1	0.27	1.0	0.516
VDRC60101 vs VDRC100143	Cyp6a9	Down-reg.	1	-0.89	-1.6	0.25
VDRC60101 vs VDRC105781	Cyp6a19	Down-reg.	1	0.59	1.37	0.41
VDRC60101 vs VDRC100679	Cyp6a23	Down-reg.	1	-3.09	-3.3	0.002
VDRC60000 vs VDRC3313	Cyp6a23	Down-reg.	1	-3.06	-2.1	0.07
VDRC60000 vs VDRC4880	Cyp6a20	Down-reg.	1	0.39	0.77	0.68
Results from general linear hypothesis test (glht) with Tukey post Hoc pairwise comparisons, to ascertain differences between pairs of treatments (package multcomp in R) after a generalized linear model with a quasibinomial distribution of the residuals.
